# Supplementary material
Source: HighWire-hosted journal article supplement (https://sit.bmj.com/highwire/filestream/539/field_highwire_adjunct_files/4/bmjsit-2022-000156supp005_data_supplement.pdf)
Supplement: bmjsit-2022-000156supp005_data_supplement.pdf [file bmjsit-2022-000156supp005_data_supplement.pdf]

Supplementary Table 5: Parathyroid identification

| Ref. No. | Author        | Country         | Journal                 | Year | Study design  | Patient selection                                                                 |                            | Imaging techniques |                                              |                            |                                                                                                                                     | Endpoint measures                                 |                          |                                                                                  |                                                                                                                                                                                                                                                                                                                                 | Learning curve                                                                       | Cost analysis                                                                                                                                                                     | Other comments | Ref. detail                                                |                                                                         |                                                                                                                              |                                                                                                       |
|----------|---------------|-----------------|-------------------------|------|---------------|-----------------------------------------------------------------------------------|----------------------------|--------------------|----------------------------------------------|----------------------------|-------------------------------------------------------------------------------------------------------------------------------------|---------------------------------------------------|--------------------------|----------------------------------------------------------------------------------|---------------------------------------------------------------------------------------------------------------------------------------------------------------------------------------------------------------------------------------------------------------------------------------------------------------------------------|--------------------------------------------------------------------------------------|-----------------------------------------------------------------------------------------------------------------------------------------------------------------------------------|----------------|------------------------------------------------------------|-------------------------------------------------------------------------|------------------------------------------------------------------------------------------------------------------------------|-------------------------------------------------------------------------------------------------------|
|          |               |                 |                         |      |               | Subject                                                                           | N (cases)                  | Fluorogenic agent  | Dose                                         | Route                      | Timing                                                                                                                              | Imaging system                                    | Quantitative measurement | Main endpoints                                                                   | Imaging accuracy/success rate                                                                                                                                                                                                                                                                                                   |                                                                                      |                                                                                                                                                                                   |                |                                                            | Clinical impact, changes in intraoperative decision-making and outcomes | Clinical impact, advantages in postoperative outcomes                                                                        | Adverse effects                                                                                       |
| 1        | Paras         | US              | J Biomed Opt            | 2011 | Prospective   | Endocrine surgery                                                                 | 21                         | Autofluorescence   | Not applicable (intrinsic)                   | Not applicable (intrinsic) | NA                                                                                                                                  | Fiber optic spectrometer (S2000-FL, Ocean Optics) | Fluorescence intensity   | Fluorescence intensity of the parathyroid gland and surrounding tissues          | The fluorescence intensity of the parathyroid gland was found to be consistently greater than that of the thyroid and all other tissues in the neck of all patients. In particular, parathyroid fluorescence was two to eleven times higher than that of the thyroid tissues with peak fluorescence occurrence at 470 to 475 nm | NA                                                                                   | NA                                                                                                                                                                                | None           | NA                                                         | NA                                                                      | Paras C, Keller M, White L, Pflug J, Mahadevan-Jansen A, Broome JT. <i>Optic</i> . 2011 Jun;16(6):0670-2.                    |                                                                                                       |
| 2        | McWade        | US              | Surgery                 | 2013 | Not stated    | Parathyroidectomy and thyroidectomy                                               | 45                         | Autofluorescence   | Not applicable (intrinsic)                   | Not applicable (intrinsic) | After identifying the parathyroid tissue                                                                                            | Ocean Optics spectrometer                         | NA                       | Detect the parathyroid glands to avoid inadvertent removal                       | 100%                                                                                                                                                                                                                                                                                                                            | NA                                                                                   | NA                                                                                                                                                                                | None           | NA                                                         | NA                                                                      | McWade MA, Paras C, White LM, Pflug JE, Mahadevan-Jansen A, Broome JT. <i>Surgery</i> . 2013 Dec;154(6):1371-7.              |                                                                                                       |
| 3        | McWade        | US              | J Clin Endocrinol Metab | 2014 | Case series   | Parathyroidectomy and thyroidectomy                                               | 6                          | Autofluorescence   | Not applicable (intrinsic)                   | Not applicable (intrinsic) | After identifying the parathyroid tissue                                                                                            | Ocean Optics spectrometer                         | NA                       | Localize the parathyroid glands                                                  | 100%                                                                                                                                                                                                                                                                                                                            | NA                                                                                   | NA                                                                                                                                                                                | None           | NA                                                         | NA                                                                      | Solorzano CC, Broome JT, et al. <i>J Clin Endocrinol Metab</i> . 2014 Dec;091(9):4574-80.                                    |                                                                                                       |
| 4        | Tunmes        | The Netherlands | Surgery                 | 2015 | Prospective   | Parathyroidectomy                                                                 | 13                         | Methylene blue     | 0.5 mg/kg                                    | IV                         | After start of anesthesia                                                                                                           | mini FLARE                                        | NA                       | Detect parathyroid adenomas                                                      | 69% (n of 9 of the 13 patients, fluorescence differentiated between healthy and diseased glands)                                                                                                                                                                                                                                | NA                                                                                   | NA                                                                                                                                                                                | None           | NA                                                         | NA                                                                      | Tunmes OR, Schepers A, Hamming JF, Kooij J, Frangioni JV, van de Velde CJ, et al. <i>Surg</i> . 2015 Nov;158(5):1233-30.     |                                                                                                       |
| 5        | Chakelis      | US              | BMJ Case Rep            | 2015 | Case report   | Parathyroidectomy (reoperative)                                                   | 1                          | ICG                | 2.5 mg/ml, and 3 ml.                         | IV                         | After exposure of the neck tissues                                                                                                  | PINPOINT                                          | NA                       | Localize the parathyroid glands                                                  | 100%                                                                                                                                                                                                                                                                                                                            | NA                                                                                   | Improvement in symptoms within 1 day; no adverse events                                                                                                                           | None           | NA                                                         | NA                                                                      | Chakelis JM, Moore C, Brumand KT, Boonet M. <i>BMJ Case Rep</i> . 2015 Sep;2015 Sep;2015(9):e201521177.                      |                                                                                                       |
| 6        | McWade        | US              | Surgery                 | 2016 | Prospective   | Parathyroidectomy and thyroidectomy                                               | 137                        | Autofluorescence   | Not applicable (intrinsic)                   | Not applicable (intrinsic) | After exposure of the neck tissues                                                                                                  | Ocean Optics spectrometer                         | NA                       | Detect the parathyroid glands to avoid inadvertent removal                       | 97% (256 of 264 glands were identified correctly)                                                                                                                                                                                                                                                                               | NA                                                                                   | NA                                                                                                                                                                                | None           | NA                                                         | NA                                                                      | McWade MA, Simeone ME, Broome JT, Solórzano CC, Mahadevan-Jansen A. <i>Surgery</i> . 2016 Jan;159(1):193-202.                |                                                                                                       |
| 7        | Vidal Fortuny | Switzerland     | Br J Surg               | 2016 | Prospective   | Total thyroidectomy                                                               | 36                         | ICG                | 3.5 mL for a maximum of 5 mg/kg as necessary | IV                         | After thyroid resection                                                                                                             | PINPOINT                                          | NA                       | Predict normal parathyroid function after surgery by visualizing vascularization | 83% (successful in 30 of 36 patients)                                                                                                                                                                                                                                                                                           | NA                                                                                   | Transient hypoparathyroidism was observed in 2 patients                                                                                                                           | None           | NA                                                         | NA                                                                      | Vidal Fortuny J, Bellóni V, Sadowski SM, Karcenovic W, Grunig S, Triponez F. <i>Br J Surg</i> . 2016 Apr;103(4):e57-61.      |                                                                                                       |
| 8        | Zaidi         | US              | J Surg Oncol            | 2016 | Prospective   | Parathyroidectomy                                                                 | 33                         | ICG                | 5 mg                                         | IV                         | After exposing the central neck compartment, an additional dose was given later to assess perfusion in remnant tissue               | PINPOINT                                          | NA                       | Localize the parathyroid glands and assess perfusion                             | 92.9% (104 of 112 glands were identified correctly)                                                                                                                                                                                                                                                                             | NA                                                                                   | No postoperative hypoparathyroidism in any patient                                                                                                                                | None           | NA                                                         | NA                                                                      | Zaidi N, Bucak E, Okob A, Yazici P, Yigitbas H, Boerber E. <i>J Surg Oncol</i> . 2016 Jun;113(7):771-4.                      |                                                                                                       |
| 9        | Zaidi         | US              | J Surg Oncol            | 2016 | Prospective   | Total thyroidectomy                                                               | 27                         | ICG                | 5 mg                                         | IV                         | After exposing the central neck compartment, an additional dose was given after thyroidectomy to assess perfusion in remnant tissue | PINPOINT                                          | NA                       | Localize the parathyroid glands and assess perfusion                             | 84% (71 of 85 parathyroid glands could be identified by ICG)                                                                                                                                                                                                                                                                    | NA                                                                                   | 1 patient exhibited hypocalcemia                                                                                                                                                  | None           | NA                                                         | NA                                                                      | Zaidi N, Bucak E, Yazici P, Soudamranjan S, Okob A, Yigitbas H, et al. <i>J Surg Oncol</i> . 2016 Jun;113(7):775-8.          |                                                                                                       |
| 10       | Falco         | Argentina       | J Am Coll Surg          | 2016 | Not stated    | Thyroid and parathyroid surgery                                                   | 28                         | Autofluorescence   | Not applicable (intrinsic)                   | Not applicable (intrinsic) | After exposing the thyroid and parathyroid glands                                                                                   | Flobeam (Fluoptics)                               | NA                       | Identify the parathyroid glands to avoid accidental resection                    | 100%                                                                                                                                                                                                                                                                                                                            | NA                                                                                   | No postoperative hypocalcemia or other complications                                                                                                                              | None           | NA                                                         | NA                                                                      | Falco J, Dip F, Quadri P, de la Fuente M, Rosenthal R. <i>J Am Coll Surg</i> . 2016 Apr;122(4):e72-80.                       |                                                                                                       |
| 11       | Vidal Fortuny | Switzerland     | J Am Coll Surg          | 2016 | Not stated    | Subtotal parathyroidectomy                                                        | 13                         | ICG                | 3.5 mL for a maximum of 5 mg/kg as necessary | IV                         | Before resection of the parathyroid gland                                                                                           | PINPOINT                                          | NA                       | Evaluate vascularization to select the target parathyroid remnant                | 100%                                                                                                                                                                                                                                                                                                                            | ICG angiography determined which parathyroid remnant to preserve (the best perfused) | No postoperative complications; two patients required intravenous calcium infusions                                                                                               | None           | NA                                                         | NA                                                                      | Vidal Fortuny J, Sadowski SM, Bellóni V, Karcenovic W, Grunig S, Triponez F. <i>J Am Coll Surg</i> . 2016 Nov;123(5):e1-6.   |                                                                                                       |
| 12       | De Leeuw      | France          | World J Surg            | 2016 | Prospective   | Total or partial thyroidectomy or parathyroidectomy                               | 35 (81 parathyroid glands) | Autofluorescence   | Not applicable (intrinsic)                   | Not applicable (intrinsic) | After exposing the thyroid and parathyroid glands                                                                                   | Flobeam (Fluoptics)                               | NA                       | Identify the parathyroid glands to avoid accidental resection                    | 100%                                                                                                                                                                                                                                                                                                                            | NA                                                                                   | None                                                                                                                                                                              | NA             | NA                                                         | NA                                                                      | De Leeuw F, Broznik I, Abbasi M, Cavaragli C, Mirghani H, Bon Laidier A, et al. <i>World J Surg</i> . 2016 Sep;40(9):1114-8. |                                                                                                       |
| 13       | Kim           | South Korea     | J Clin Endocrinol Metab | 2016 | Case series   | Total thyroidectomy and hemithyroidectomy                                         | 8 (16 glands)              | Autofluorescence   | Not applicable (intrinsic)                   | Not applicable (intrinsic) | After dissection of the parathyroid gland                                                                                           | EOS Rebel, Canon                                  | NA                       | Localize the parathyroid glands                                                  | 100%                                                                                                                                                                                                                                                                                                                            | NA                                                                                   | No postoperative hypoparathyroidism in any patient                                                                                                                                | None           | NA                                                         | NA                                                                      | Kim SW, Song SH, Lee HK, Noh WJ, Gwak C, Ahn YC, et al. <i>J Clin Endocrinol Metab</i> . 2016 Dec;101(12):4646-4651.         |                                                                                                       |
| 14       | Vidal Fortuny | Switzerland     | World J Surg            | 2016 | Not stated    | Subtotal parathyroidectomy                                                        | Not stated                 | ICG                | 0.3 mg/kg for a maximum total of 5 mg/kg     | IV                         | Prior to resection of the parathyroid glands                                                                                        | PINPOINT                                          | NA                       | Confirm the vascular status of the parathyroid glands                            | NA                                                                                                                                                                                                                                                                                                                              | NA                                                                                   | None                                                                                                                                                                              | NA             | NA                                                         | NA                                                                      | Vidal Fortuny J, Triponez F, Sadowski SM. <i>World J Surg</i> . 2016 Oct;40(10):1278-81.                                     |                                                                                                       |
| 15       | Lang          | China           | Surgery                 | 2017 | Not stated    | Total thyroidectomy                                                               | 70                         | ICG                | 2.5 mg                                       | IV                         | After removal of the entire thyroid gland                                                                                           | SPY Elite                                         | Fluorescence intensity   | Assess parathyroid gland perfusion and function after total thyroidectomy        | Fluorescence intensity varied greatly between patients                                                                                                                                                                                                                                                                          | NA                                                                                   | Postoperative hypocalcemia was only observed in patients whose ICG fluorescence was weak; 9 patients experienced postoperative hypocalcemia that lasted a few days to a few weeks | None           | Estimated at \$253 per patient at the authors' institution | NA                                                                      | NA                                                                                                                           | Lang BH, Wang CK, Hung HF, Wong KP, Mak KL, Au KB. <i>Surg</i> . 2017 Jun;161(1):87-85.               |
| 16       | Ladurner      | Germany         | Surg Endosc             | 2017 | Prospective   | Minimally invasive and open parathyroid and thyroid surgery                       | 25 (35 parathyroid glands) | Autofluorescence   | Not applicable (intrinsic)                   | Not applicable (intrinsic) | After identifying the parathyroid tissue                                                                                            | Karl Storz                                        | NA                       | Identify the parathyroid glands to avoid accidental resection                    | 77% (27 of 35 glands were identified correctly; the other 8 were embedded in adipose tissue)                                                                                                                                                                                                                                    | NA                                                                                   | NA                                                                                                                                                                                | None           | NA                                                         | NA                                                                      | Ladurner R, Sommerer S, Arabi NA, Hallfeldt KK, Stepp H, Galwas R. <i>Surg Endosc</i> . 2017 Aug;31(8):3140-14.              |                                                                                                       |
| 17       | Yu            | South Korea     | Surg Endosc             | 2017 | Prospective   | Bilateral axillo-breast approach robotic total thyroidectomy or thyroid lobectomy | 22 (+44 control)           | ICG                | 10 mg                                        | IV                         | After dissecting the strap muscle from the thyroid                                                                                  | da Vinci Si                                       | NA                       | Identify the parathyroid glands to avoid accidental resection                    | 100%                                                                                                                                                                                                                                                                                                                            | ICG angiography lowered the rate of incidental parathyroidectomy                     | Some cases of transient or permanent hypoparathyroidism                                                                                                                           | None           | NA                                                         | NA                                                                      | Yu HW, Chung JW, Yi JW, Song BY, Lee JH, Kwon H, et al. <i>Surg Endosc</i> . 2017 Jul;31(7):1676-1677.                       |                                                                                                       |
| 18       | Falco         | Argentina       | Surg Endosc             | 2017 | Retrospective | Thyroid and parathyroid surgery (various pathologies)                             | 74                         | Autofluorescence   | Not applicable (intrinsic)                   | Not applicable (intrinsic) | After retracting the strap muscle and recording the number of glands observed under white light                                     | Not stated                                        | NA                       | Identify the parathyroid glands to avoid accidental resection                    | 80% (Visualizing all 4 glands was possible in 64 patients by autofluorescence but only in 9 patients under white light)                                                                                                                                                                                                         | NA                                                                                   | No permanent hypocalcemia                                                                                                                                                         | None           | NA                                                         | NA                                                                      | In 1 patient, ICG angiography was used to confirm vascularization                                                            | Falco J, Dip F, Quadri P, de la Fuente M, Rosenthal R. <i>Surg Endosc</i> . 2017 Sep;31(9):3737-3742. |

| Author           | Country                   | Journal               | Year | Study Design  | Intervention                                                | Control                  | Outcome          | Notes                                                                    | Reference                                                      |                                                                                                   |                                      |                        |                                                                                                        |                                                                                                                                                                                                                                              |                                                                                                                                                                                           |                                                                                                                                                                             |      |      |    |                                                                                                                            |                                                                                                                                                                 |
|------------------|---------------------------|-----------------------|------|---------------|-------------------------------------------------------------|--------------------------|------------------|--------------------------------------------------------------------------|----------------------------------------------------------------|---------------------------------------------------------------------------------------------------|--------------------------------------|------------------------|--------------------------------------------------------------------------------------------------------|----------------------------------------------------------------------------------------------------------------------------------------------------------------------------------------------------------------------------------------------|-------------------------------------------------------------------------------------------------------------------------------------------------------------------------------------------|-----------------------------------------------------------------------------------------------------------------------------------------------------------------------------|------|------|----|----------------------------------------------------------------------------------------------------------------------------|-----------------------------------------------------------------------------------------------------------------------------------------------------------------|
| 19 Cui           | China                     | Sci Rep               | 2017 | Prospective   | Total parathyroidectomy for secondary hyperparathyroidism   | 20 (+9 control)          | ICG              | 0.5 mg/kg                                                                | IV                                                             | Before the start of anesthesia                                                                    | AISERY                               | NA                     | Localize the parathyroid glands                                                                        | There were 5 false positives and 2 false negatives. 90% (37 of 41 glands) were identified correctly (authors are unable to specify the reason for failing to identify the last 4 glands from 7 patients)                                     | The resection rate was higher in the group that received ICG angiography                                                                                                                  | 4 patients experienced persistent hypoparathyroidism (2 in the ICG group and 2 in the non-ICG group)                                                                        | None | NA   | NA | Cui L, Gao Y, Yu H, Li M, Wang B, Zhou T, et al. <i>Sci Rep</i> . 2017 Aug 15;7:11193.                                     |                                                                                                                                                                 |
| 20 Ladurner      | Germany                   | Ann R Coll Surg Engl  | 2018 | Prospective   | Thyroidectomy with or without central lymph node dissection | 20 (41 glands)           | Autofluorescence | Not applicable (intrinsic)                                               | Not applicable (intrinsic)                                     | After identifying the parathyroid tissue                                                          | Karl Storz                           | NA                     | Identify the parathyroid glands to avoid accidental resection                                          | Autofluorescence helped to determine the course of the surgery in 2 cases                                                                                                                                                                    | NA                                                                                                                                                                                        | None                                                                                                                                                                        | None | NA   | NA | Ladurner R, Al Anabi N, Grendeliger U, Haffner R, Stepp H, Galwas J. <i>Ann R Coll Surg Engl</i> . 2019 Jun;100(1):133-36. |                                                                                                                                                                 |
| 21 Beamloud      | France                    | Surgery               | 2018 | Prospective   | Total thyroidectomy                                         | 93 (+420 control)        | Autofluorescence | Not applicable (intrinsic)                                               | Not applicable (intrinsic)                                     | During exposure of the thyroid lobe                                                               | Floobeam (Flooptics)                 | NA                     | Determine whether autofluorescence imaging reduces the risk of postoperative hypocalcaemia             | 76.3%                                                                                                                                                                                                                                        | Fluorescence imaging avoided some cases of parathyroid autotransplantation                                                                                                                | Autofluorescence imaging decreased postoperative hypocalcaemia rates (5.2% versus 20.9%); permanent hypocalcaemia developed in 2 patients who received fluorescence imaging | None | None | NA | NA                                                                                                                         | Beamloud F, Fournier G, Bannier M, Davinet A, Serrero Kim SW, Lee JH, Ahn YC, Park CW, Jeon SW, Kim CH, et al. <i>J Am Coll Surg</i> . 2018 Feb;126(2):166-172. |
| 22 Kim           | South Korea               | J Am Coll Surg        | 2018 | Prospective   | Thyroidectomy                                               | 38 (70 glands)           | Autofluorescence | Not applicable (intrinsic)                                               | Not applicable (intrinsic)                                     | Before identifying the gland under white light                                                    | EOS Rebel, Canon                     | NA                     | Localize the parathyroid glands                                                                        | Sensitivity, specificity, and accuracy were all 100%; 1 gland could not be identified by autofluorescence                                                                                                                                    | NA                                                                                                                                                                                        | 1 patient experienced temporary hypocalcaemia                                                                                                                               | None | None | NA | NA                                                                                                                         | Kim CH, et al. <i>J Am Coll Surg</i> . 2018 Feb;126(2):166-172.                                                                                                 |
| 23 DeLong        | US                        | Surgery               | 2018 | Retrospective | Parathyroidectomy for primary hyperparathyroidism           | 60                       | ICG              | 3 mL of 2.5 mg/mL                                                        | IV                                                             | After identifying the suspected lesions                                                           | PINPOINT                             | NA                     | Localize the parathyroid glands                                                                        | 93%                                                                                                                                                                                                                                          | NA                                                                                                                                                                                        | "There were no patients with a documented failure of treatment, and there were no cases of recurrent hypoparathyroidism"                                                    | None | None | NA | NA                                                                                                                         | DeLong R, Ward EP, Lavin TM, Brumand KT, Kelly KJ, Hoque S, et al. <i>Surgery</i> . 2018 Feb;163(2):388-397.                                                    |
| 24 Hillary       | UK                        | Langenbecks Arch Surg | 2018 | Prospective   | Thyroid and parathyroid surgery                             | 41                       | Methylene blue   | Between 0.05 and 0.5 mg/kg (optimum dose was determined to be 0.4 mg/kg) | IV                                                             | After exposure of the thyroid and parathyroid glands                                              | Floobeam (Flooptics)                 | NA                     | Identify the parathyroid glands to avoid accidental resection                                          | Unclear but appears to be fairly successful                                                                                                                                                                                                  | NA                                                                                                                                                                                        | NA                                                                                                                                                                          | None | None | NA | NA                                                                                                                         | Hillary S, Guillemer S, Brown NI, Balanabrammuni SP, Langenbecks Arch Surg. 2018 Feb;303(1):111-118.                                                            |
| 25 Vidal Fortuny | Switzerland               | Br J Surg             | 2018 | RCT           | Total thyroidectomy or completion thyroidectomy             | 196                      | ICG              | 2.5 mg/mL                                                                | IV                                                             | After removing the thyroid                                                                        | PINPOINT                             | NA                     | Determine whether well-perfused parathyroid glands are a predictor of postoperative hypoparathyroidism | In 50 patients, ICG did not demonstrate at least 1 well-perfused thyroid gland; these patients were excluded from the remainder of the study                                                                                                 | None                                                                                                                                                                                      | None of the patients with at least one well-perfused gland presented with hypoparathyroidism, including those who did not receive calcium supplementation.                  | None | None | NA | NA                                                                                                                         | Vidal Fortuny J, Sadownik SM, Bitteloni V, Guigard S, Ponce A, Rio F, et al. <i>Br J Surg</i> . 2018 Mar;105(4):350-357.                                        |
| 26 Kahramangil   | US, France, and Argentina | Ann Surg Oncol        | 2018 | Retrospective | Thyroidectomy and parathyroidectomy                         | 210                      | Autofluorescence | Not applicable (intrinsic)                                               | Not applicable (intrinsic)                                     | After exposure of the tissues                                                                     | Floobeam (Flooptics)                 | NA                     | Determine whether autofluorescence imaging facilitates identification of parathyroid glands            | On logistic regression, smaller ICGs were more likely to be missed visually, but localized by AF on NBI (odds ratio with increasing size, 0.91; $p = 0.07$ )                                                                                 | Upon initial exploration, 46% of PIGs were not visible to the naked eye due to coverage by soft tissue, but AF from these glands could be detected by NBI without any further dissection. | NA                                                                                                                                                                          | None | None | NA | NA                                                                                                                         | Kahramangil B, Dp F, Berniolini F, Falcó J, de La Fuente M, Verna S, et al. <i>Ann Surg Oncol</i> . 2018 Apr;25(4):957-962.                                     |
| 27 Alstina       | Germany                   | Langenbecks Arch Surg | 2018 | Case series   | Video-assisted neck surgery                                 | 5                        | Autofluorescence | 2.5 mg/mL for the ICG; repeated when needed                              | IV for the ICG after dissection (to visualize vascularization) | After exposure of the tissues, ICG after dissection (to visualize vascularization)                | Karl Storz                           | NA                     | Localize the parathyroid glands                                                                        | 69% for autofluorescence 75% for ICG                                                                                                                                                                                                         | NA                                                                                                                                                                                        | No postoperative complications                                                                                                                                              | None | None | NA | NA                                                                                                                         | Alstina PF, Meier B, Hirschi J, Melamed W, Walz MK, Langenbecks Arch Surg. 2018 May;403(5):585-401.                                                             |
| 28 Thomas        | US                        | Thyroid               | 2018 | Not stated    | Thyroidectomy and/or parathyroidectomy                      | 35                       | Autofluorescence | Not applicable (intrinsic)                                               | Not applicable (intrinsic)                                     | Unclear                                                                                           | In-house prototype (PType)           | NA                     | Identify the parathyroid glands to avoid accidental resection                                          | 92.5% accuracy in guiding parathyroid identification                                                                                                                                                                                         | NA                                                                                                                                                                                        | NA                                                                                                                                                                          | None | None | NA | NA                                                                                                                         | Thomas G, McWade MA, Paris C, Mamoh EA, Sanders ME, Ware EM, et al. <i>Thyroid</i> . 2018 Nov;28(11):1517-1521.                                                 |
| 29 Jin           | China                     | Adv Ther              | 2018 | Not stated    | Total thyroidectomy                                         | 26                       | ICG              | 5 mg up to 5 mg/kg                                                       | IV                                                             | After resecting one lobe of the thyroid                                                           | Digital Precision Medical Technology | NA                     | Localize the parathyroid glands and predict postoperative hypoparathyroidism                           | 85% (ICG was unclear in 4 of the 26 patients, and 4 of them developed temporary hypocalcaemia/hypovitaminosis)                                                                                                                               | In 2 patients, parathyroid glands were accidentally resected despite fluorescing strongly with ICG                                                                                        | 2 cases of temporary hypoparathyroidism                                                                                                                                     | None | None | NA | NA                                                                                                                         | Jin H, Deng Q, He Z, Fan J, Liao K, Cui M. <i>Adv Ther</i> . 2018 Dec;35(12):167-2175.                                                                          |
| 30 Sound         | US                        | Surg Innov            | 2019 | Case series   | Reoperative surgery for hyperparathyroidism                 | 3                        | ICG              | 5 mg (repeated later in the operation)                                   | IV                                                             | After dividing the platysma or dissecting the tissues around the sternum                          | PINPOINT                             | NA                     | Localize the parathyroid glands                                                                        | 100%                                                                                                                                                                                                                                         | NA                                                                                                                                                                                        | No adverse postoperative events                                                                                                                                             | None | None | NA | NA                                                                                                                         | Sound S, Okoh A, Vignabas H, Yarrici P, Herber E. <i>Surg Innov</i> . 2019 Dec;26(6):774-779.                                                                   |
| 31 Kose          | US                        | Surgery               | 2019 | Prospective   | Bilateral neck exploration for primary parathyroidism       | 50 (199 glands)          | Autofluorescence | Not applicable (intrinsic)                                               | Not applicable (intrinsic)                                     | After dissection of the strap muscles but before explorative dissection                           | Floobeam (Flooptics)                 | Fluorescence intensity | Compare autofluorescence from healthy and diseased parathyroid glands                                  | 96%                                                                                                                                                                                                                                          | Hypofunctioning glands had lower autofluorescence; early detection possibly shortened the length of the procedure                                                                         | NA                                                                                                                                                                          | None | None | NA | NA                                                                                                                         | Kose E, Kahramangil B, Aydin H, Baumert M, Herber E. <i>Surgery</i> . 2019 Feb;165(2):431-437.                                                                  |
| 32 Jin           | China                     | Am J Otolaryngol      | 2019 | Case series   | Total thyroidectomy                                         | 3                        | ICG              | 5 mg up to 5 mg/kg                                                       | IV                                                             | Unclear - after exposure of the tissues but unknown whether before or after resecting the thyroid | Digital Precision Medical Technology | NA                     | Localize the parathyroid glands                                                                        | 100%                                                                                                                                                                                                                                         | NA                                                                                                                                                                                        | No adverse outcomes                                                                                                                                                         | None | None | NA | NA                                                                                                                         | Jin H, Fan J, Yang J, Liao K, He Z, Cui M. <i>Am J Otolaryngol</i> . 2019 Mar; Apr;40(2):323-330.                                                               |
| 33 Thomas        | US                        | Surgery               | 2019 | Prospective   | Thyroidectomy or parathyroidectomy                          | 20                       | Autofluorescence | Not applicable (intrinsic)                                               | Not applicable (intrinsic)                                     | After visual inspection of the exposed tissues                                                    | In-house prototype (PType)           | NA                     | Identify the parathyroid glands to avoid accidental resection                                          | 98% (54 of 55 glands)                                                                                                                                                                                                                        | NA                                                                                                                                                                                        | NA                                                                                                                                                                          | None | None | NA | NA                                                                                                                         | Thomas G, McWade MA, Nguyen JQ, Sanders ME, Broome JT, Hargrave N, et al. <i>Surgery</i> . 2019 Jun;165(1):134-139.                                             |
| 34 van den Bos   | The Netherlands           | Head Neck             | 2019 | Prospective   | Elective thyroidectomy                                      | 26 (30 surgeries)        | ICG              | 7.5 mg                                                                   | IV                                                             | Before thyroid resection and again after thyroid resection                                        | Karl Storz                           | NA                     | Localize the parathyroid glands before resection and assess perfusion after resection                  | 88% (In 3 of the patients, there was no ICG fluorescence to identify the parathyroid glands; the authors suspect that the glands had accidentally been resected before the imaging or that damage had occurred to blood vessels on the same) | ICG imaging was useful to the surgery course in 17 of the 30 procedures; in 2 of the 17 patients, ICG was the only identifier of parathyroid location (not evident visually)              | 1 case of arterial bleeding requiring reoperation; 1 wound infection that required antibiotics                                                                              | None | None | NA | NA                                                                                                                         | van den Bos J, van Kooren L, Engelen SME, Labbers T, Stansen LPS, Bouvy ND. <i>Head Neck</i> . 2019 Feb;41(2):348-348.                                          |
| 35 Galvez-Pastor | Spain                     | Am J Surg             | 2019 | Prospective   | Total thyroidectomy                                         | 39                       | ICG              | 3 to 6 mL of 25 mg/10 mL                                                 | IV                                                             | After thyroidectomy                                                                               | PINPOINT                             | NA                     | Predict hypocalcaemia                                                                                  | 82% (all 4 glands were identified successfully in 32 of 39 patients)                                                                                                                                                                         | The ICG score adequately predicted postoperative hypocalcaemia and postoperative parathyroid function; 6 patients developed hypocalcaemia                                                 | None                                                                                                                                                                        | None | NA   | NA | NA                                                                                                                         | Galvez-Pastor S, Torregrosa NM, Ros A, Fehrens B, Gonzalez-Costa R, Garcia-Lopez MA, et al. <i>Am J Surg</i> . 2019 Nov;178(5):601-606.                         |
| 36 Jin           | China                     | Clin Endocrinol (Oxf) | 2019 | Prospective   | Total thyroidectomy                                         | 26                       | ICG              | 5 mg                                                                     | IV                                                             | After thyroidectomy                                                                               | Digital Precision Medical Technology | NA                     | Assess vascularization after resection and predict postoperative hypoparathyroidism                    | 85% (in 4 of the 26 patients, the area fluoresced under ICG but not clearly enough to assess that vascularization was adequate)                                                                                                              | NA                                                                                                                                                                                        | 2 patients with low ICG vascularization score developed transient hypoparathyroidism                                                                                        | None | None | NA | NA                                                                                                                         | Jin H, Deng Q, He Z, Fan J, Liao K, Cui M. <i>Clin Endocrinol (Oxf)</i> . 2019 Mar;90(3):487-493.                                                               |
| 37 Squires       | US                        | Ann Surg Oncol        | 2019 | Prospective   | Parathyroidectomy                                           | 59 (69 glands to resect) | Autofluorescence | Not applicable (intrinsic)                                               | Not applicable (intrinsic)                                     | After mobilizing the thyroid                                                                      | PDE Hamamatsu                        | Fluorescence intensity | Identify the parathyroid glands to avoid accidental resection                                          | NA                                                                                                                                                                                                                                           | Imaging increased intraoperative confidence of parathyroid identification and was helpful in 21 of the 59 patients                                                                        | NA                                                                                                                                                                          | None | None | NA | NA                                                                                                                         | Squires MH, Larin R, Shirley LA, Phay JE. <i>Ann Surg Oncol</i> . 2019 Apr;26(4):1142-1148.                                                                     |

|    |           |             |                       |      |               |                                                                   |                              |                  |                            |                            |                                                                |                                         |                        |                                                                                                                                         |                                                                                                                                                                                                                                                                                                                                |                                                                                                                                                                                                                                          |                                                                                                                                                                                                                                                                                                                                                                |      |                                                              |    |                                                                                                                                                                                                                                                                                                                                                                                                                                                                                                                                                                                                              |                                                                                                                 |
|----|-----------|-------------|-----------------------|------|---------------|-------------------------------------------------------------------|------------------------------|------------------|----------------------------|----------------------------|----------------------------------------------------------------|-----------------------------------------|------------------------|-----------------------------------------------------------------------------------------------------------------------------------------|--------------------------------------------------------------------------------------------------------------------------------------------------------------------------------------------------------------------------------------------------------------------------------------------------------------------------------|------------------------------------------------------------------------------------------------------------------------------------------------------------------------------------------------------------------------------------------|----------------------------------------------------------------------------------------------------------------------------------------------------------------------------------------------------------------------------------------------------------------------------------------------------------------------------------------------------------------|------|--------------------------------------------------------------|----|--------------------------------------------------------------------------------------------------------------------------------------------------------------------------------------------------------------------------------------------------------------------------------------------------------------------------------------------------------------------------------------------------------------------------------------------------------------------------------------------------------------------------------------------------------------------------------------------------------------|-----------------------------------------------------------------------------------------------------------------|
| 38 | Dp        | Argentina   | J Am Coll Surg        | 2019 | RCT           | Total thyroidectomy                                               | 85 (+85 control)             | Autofluorescence | Not applicable (intrinsic) | Not applicable (intrinsic) | Before thyroid dissection                                      | Floobeam (Fhoiptics)                    | NA                     | Identify the parathyroid glands to avoid accidental resection and predict postoperative hypocalcaemia                                   | The mean number of parathyroid glands identified pre-dissection with NIRi was the same identified post-dissection with WL (3.5 vs 3.6). In the experimental group, converting from WL to NIRi increased the number of glands detected from 2.6 to 3.5 (p < 0.001), and revealed at least 1 previously missed gland in 67.1% of | Imaging revealed at least 1 previously missed gland in 67.1% of patients                                                                                                                                                                 | Calcium levels equal or lower than 7.5 mg/dL were one-third as common in the NIRi group (p = 0.005). The adjusted odds of hypocalcaemia developing increased by 15% for every 5-g increase in thyroid gland weight (odds ratio 1.15; 95% CI 1.06 to 1.25).                                                                                                     | None | NA                                                           | NA | Dip F, Falco J, Verma S, Prud'homme M, Luciani M, Quadri P, et al. J Am Coll Surg 2019 May;228(5):530-543<br>Wolff HW, Grambsch B, Runkel N. Updates Surg 2019 Sep;71(3):579-585                                                                                                                                                                                                                                                                                                                                                                                                                             |                                                                                                                 |
| 39 | McWade    | US          | J Am Coll Surg        | 2019 | Prospective   | Thyroidectomy or parathyroidectomy                                | 30                           | Autofluorescence | Not applicable (intrinsic) | Not applicable (intrinsic) | Before dissection                                              | In-house overlay tissue imaging system  | NA                     | Identify the parathyroid glands                                                                                                         | 97%                                                                                                                                                                                                                                                                                                                            | NA                                                                                                                                                                                                                                       | None                                                                                                                                                                                                                                                                                                                                                           | None | NA                                                           | NA | McWade MA, Thomas G, Nguyen JQ, Sanders ME, Solórzano CC, Mahadevan-Jansen A. J Am Coll Surg 2019 Mar;228(3):330-343<br>Wolff HW, Grambsch B, Runkel N. Updates Surg 2019 Sep;71(3):579-585                                                                                                                                                                                                                                                                                                                                                                                                                  |                                                                                                                 |
| 40 | Wolf      | Germany     | Updates Surg          | 2019 | Retrospective | Bilateral neck exploration, parathyroidectomy, and thyroidectomy  | 39 (66 glands)               | Autofluorescence | Not applicable (intrinsic) | Not applicable (intrinsic) | Before dissection                                              | Karl Storz                              | NA                     | Identify the parathyroid glands                                                                                                         | 86% (57 of 66 glands autofluoresced)                                                                                                                                                                                                                                                                                           | NA                                                                                                                                                                                                                                       | NA                                                                                                                                                                                                                                                                                                                                                             | None | NA                                                           | NA | Radin AV, McKenzie TJ, Thompson GB, Farley DR, Jostes ML, World J Surg 2019 Jun;5(6):1538-1543                                                                                                                                                                                                                                                                                                                                                                                                                                                                                                               |                                                                                                                 |
| 41 | Rudin     | US          | World J Surg          | 2019 | Retrospective | Total or near-total thyroidectomy                                 | 86 (+124 control)            | ICG              | 3 mL                       | IV                         | After thyroidectomy                                            | PINPOINT                                | NA                     | Predict parathyroid function after thyroidectomy, guide autotransplantation, and decrease the incidence of permanent hypoparathyroidism | 87%                                                                                                                                                                                                                                                                                                                            | ICG imaging prevented the autotransplantation of 19 glands (6.8%)                                                                                                                                                                        | 22 of the 86 patients that received ICG imaging developed transient hypoparathyroidism                                                                                                                                                                                                                                                                         | None | The learning curve of interpreting green fluorescence may be | NA | Radin AV, McKenzie TJ, Thompson GB, Farley DR, Jostes ML, World J Surg 2019 Jun;5(6):1538-1543                                                                                                                                                                                                                                                                                                                                                                                                                                                                                                               |                                                                                                                 |
| 42 | DMarco    | UK          | World J Surg          | 2019 | Prospective   | Parathyroidectomy                                                 | 96 (284 glands)              | Autofluorescence | Not applicable (intrinsic) | Not applicable (intrinsic) | After exposing the glands                                      | Floobeam (Fhoiptics)                    | NA                     | Assess the clinical utility of autofluorescence in parathyroid surgery                                                                  | 90.5% (257 glands out of 284 were visualized successfully)                                                                                                                                                                                                                                                                     | NA                                                                                                                                                                                                                                       | NA                                                                                                                                                                                                                                                                                                                                                             | None | NA                                                           | NA | DMarco A, Chotalia R, Hoshkam K, McInyre C, Tolley N, Palazzo FF. World J Surg 2019 Nov;43(11):1417-1427<br>Razavi AC, Bralcom K, Haddad A, Saparwa L, Salaby H, Abdelgawad M, et al. Head Neck 2019 Sep;41(9):1276-1281<br>Ludmer R, Lenzhoebner M, Al Arabi N, Gallwas RK, Steg H, Halfield KK. Molecules 2019 Jul 14;24(14):2560<br>DMarco A, Chotalia R, Hoshkam K, McInyre C, Tolley N, Palazzo FF, Ann R Coll Surg Engl 2019 Nov;101(7):666-671<br>Serra C, Silvestri L, Canudo A, Lemos MC, BMC Surg 2019 Aug 28;19(1):170<br>Kim Y, Kim SW, Lee KD, Ahn YC. J Biophotonics 2019 Dec;12(12):201900017 |                                                                                                                 |
| 43 | Razavi    | US          | Head Neck             | 2019 | Retrospective | Thyroid and/or central compartment surgeries                      | 43 (148 control)             | ICG              | 5 mg                       | IV                         | At the end of the surgery                                      | Olympus scope with a NIR camera         | NA                     | Predict parathyroid vascularization                                                                                                     | In 43 patients, the ICG score was zero                                                                                                                                                                                                                                                                                         | NA                                                                                                                                                                                                                                       | A few patients (number not given) experienced transient hypocalcaemia (not predicted by ICG score)                                                                                                                                                                                                                                                             | None | NA                                                           | NA | Razavi AC, Bralcom K, Haddad A, Saparwa L, Salaby H, Abdelgawad M, et al. Head Neck 2019 Sep;41(9):1276-1281<br>Ludmer R, Lenzhoebner M, Al Arabi N, Gallwas RK, Steg H, Halfield KK. Molecules 2019 Jul 14;24(14):2560<br>DMarco A, Chotalia R, Hoshkam K, McInyre C, Tolley N, Palazzo FF, Ann R Coll Surg Engl 2019 Nov;101(7):666-671<br>Serra C, Silvestri L, Canudo A, Lemos MC, BMC Surg 2019 Aug 28;19(1):170<br>Kim Y, Kim SW, Lee KD, Ahn YC. J Biophotonics 2019 Dec;12(12):201900017                                                                                                             |                                                                                                                 |
| 44 | Ladurner  | Germany     | Molecules             | 2019 | Retrospective | Open thyroid and parathyroid surgeries                            | 117 (205 parathyroid glands) | Autofluorescence | Not applicable (intrinsic) | Not applicable (intrinsic) | Before dissection                                              | Karl Storz                              | NA                     | Identify the parathyroid glands                                                                                                         | 87.3% of glands were visualized successfully; in 26 cases, the glands were not visualized successfully                                                                                                                                                                                                                         | NA                                                                                                                                                                                                                                       | NA                                                                                                                                                                                                                                                                                                                                                             | None | NA                                                           | NA | DMarco A, Chotalia R, Hoshkam K, McInyre C, Tolley N, Palazzo FF, Ann R Coll Surg Engl 2019 Nov;101(7):666-671<br>Serra C, Silvestri L, Canudo A, Lemos MC, BMC Surg 2019 Aug 28;19(1):170<br>Kim Y, Kim SW, Lee KD, Ahn YC. J Biophotonics 2019 Dec;12(12):201900017                                                                                                                                                                                                                                                                                                                                        |                                                                                                                 |
| 45 | DMarco    | UK          | Ann R Coll Surg Engl  | 2019 | Prospective   | Thyroidectomy                                                     | 106 (+163 control)           | Autofluorescence | Not applicable (intrinsic) | Not applicable (intrinsic) | After thyroidectomy                                            | Floobeam (Fhoiptics)                    | NA                     | Determine whether NIR imaging prevents accidental resection of parathyroid glands and the subsequent biochemical recovery               | NA                                                                                                                                                                                                                                                                                                                             | In 13 patients, NIR imaging showed accidental resection of parathyroid glands, requiring autotransplantation (the number was 17 patients in the controls)                                                                                | Hypocalcaemia and later hyperparathyroidism rates did not differ between cases and controls                                                                                                                                                                                                                                                                    | None | NA                                                           | NA | DMarco A, Chotalia R, Hoshkam K, McInyre C, Tolley N, Palazzo FF, Ann R Coll Surg Engl 2019 Nov;101(7):666-671<br>Serra C, Silvestri L, Canudo A, Lemos MC, BMC Surg 2019 Aug 28;19(1):170<br>Kim Y, Kim SW, Lee KD, Ahn YC. J Biophotonics 2019 Dec;12(12):201900017                                                                                                                                                                                                                                                                                                                                        |                                                                                                                 |
| 46 | Serra     | Portugal    | BMC Surg              | 2019 | Case series   | Surgery for hyperparathyroidism (no details on actual procedures) | 5                            | Autofluorescence | Not applicable (intrinsic) | Not applicable (intrinsic) | Before dissection                                              | Edmund Optics                           | Fluorescence intensity | Localize the parathyroid glands to avoid accidental resection                                                                           | NA                                                                                                                                                                                                                                                                                                                             | NA                                                                                                                                                                                                                                       | No persistent parathyroidism in any patient                                                                                                                                                                                                                                                                                                                    | None | NA                                                           | NA | DMarco A, Chotalia R, Hoshkam K, McInyre C, Tolley N, Palazzo FF, Ann R Coll Surg Engl 2019 Nov;101(7):666-671<br>Serra C, Silvestri L, Canudo A, Lemos MC, BMC Surg 2019 Aug 28;19(1):170<br>Kim Y, Kim SW, Lee KD, Ahn YC. J Biophotonics 2019 Dec;12(12):201900017                                                                                                                                                                                                                                                                                                                                        |                                                                                                                 |
| 47 | Kim       | South Korea | J Biophotonics        | 2019 | Prospective   | Total or partial thyroidectomy                                    | 26 (56 glands)               | Autofluorescence | Not applicable (intrinsic) | Not applicable (intrinsic) | Before dissection                                              | EOS (Canon) with in-house modifications | NA                     | Localize the parathyroid glands to avoid accidental resection                                                                           | Sensitivity was 98.1% and accuracy was 96.4%                                                                                                                                                                                                                                                                                   | NA                                                                                                                                                                                                                                       | NA                                                                                                                                                                                                                                                                                                                                                             | None | NA                                                           | NA | DMarco A, Chotalia R, Hoshkam K, McInyre C, Tolley N, Palazzo FF, Ann R Coll Surg Engl 2019 Nov;101(7):666-671<br>Serra C, Silvestri L, Canudo A, Lemos MC, BMC Surg 2019 Aug 28;19(1):170<br>Kim Y, Kim SW, Lee KD, Ahn YC. J Biophotonics 2019 Dec;12(12):201900017                                                                                                                                                                                                                                                                                                                                        |                                                                                                                 |
| 48 | Kose      | US          | Surgery               | 2020 | Prospective   | Thyroidectomy or parathyroidectomy                                | 173 (503 glands)             | Autofluorescence | Not applicable (intrinsic) | Not applicable (intrinsic) | Both before and after dissection                               | Floobeam (Fhoiptics)                    | NA                     | Determine the accuracy of autofluorescence in localizing the parathyroid glands                                                         | 98% (947 of 971 glands)                                                                                                                                                                                                                                                                                                        | In 7 patients, the fluorescence assisted in identifying incidentally resected glands                                                                                                                                                     | NA                                                                                                                                                                                                                                                                                                                                                             | None | NA                                                           | NA | Kose E, Radin AV, Kalkanmangli H, Moore E, Aydin H, Duncanson M, et al. Surgery 2020 Jun;167(1):173-179                                                                                                                                                                                                                                                                                                                                                                                                                                                                                                      |                                                                                                                 |
| 49 | Thomas    | US          | J Am Coll Surg        | 2019 | Prospective   | Thyroidectomy and/or parathyroidectomy                            | 20 (33 glands)               | Autofluorescence | Not applicable (intrinsic) | Not applicable (intrinsic) | Before dissection (PTeye), before and after dissection (PTeye) | PDE Hamamatsu and PTeye                 | NA                     | Compare the performance of two systems for localizing the parathyroid glands                                                            | Accuracy in imaging was 84.6% for the PDE and 92.3% for the PTeye                                                                                                                                                                                                                                                              | NA                                                                                                                                                                                                                                       | NA                                                                                                                                                                                                                                                                                                                                                             | None | NA                                                           | NA | Thomas G, Squires MR, Mehall F, Mahadevan-Jansen A, Phay JE. J Am Coll Surg 2019 Dec;228(6):666-671<br>Liu L, Wang S, Wang R, Xu C, Zhao R, Li H, et al. BMC Surg 2020 Jun 6;20(1):4                                                                                                                                                                                                                                                                                                                                                                                                                         |                                                                                                                 |
| 50 | Liu       | China       | BMC Surg              | 2020 | Not stated    | Thyroidectomy                                                     | 20                           | Autofluorescence | Not applicable (intrinsic) | Not applicable (intrinsic) | Before dissection (although this is unclear)                   | i-Raman Pro                             | NA                     | Localize the parathyroid glands to avoid accidental resection                                                                           | 95% (19 out of 20 patients)                                                                                                                                                                                                                                                                                                    | NA                                                                                                                                                                                                                                       | NA                                                                                                                                                                                                                                                                                                                                                             | None | NA                                                           | NA | Thomas G, Squires MR, Mehall F, Mahadevan-Jansen A, Phay JE. J Am Coll Surg 2019 Dec;228(6):666-671<br>Liu L, Wang S, Wang R, Xu C, Zhao R, Li H, et al. BMC Surg 2020 Jun 6;20(1):4                                                                                                                                                                                                                                                                                                                                                                                                                         |                                                                                                                 |
| 51 | Bennilouf | France      | JAMA Surg             | 2020 | RCT           | Total thyroidectomy                                               | 121 (+120 control)           | Autofluorescence | Not applicable (intrinsic) | Not applicable (intrinsic) | Before dissection                                              | Floobeam (Fhoiptics)                    | NA                     | Localize the parathyroid glands to avoid accidental resection and reduce postoperative hypocalcaemia                                    | NA                                                                                                                                                                                                                                                                                                                             | The number of inadvertently resected parathyroid glands was significantly lower in the NIRAF group than in the control group: 3 patients (2.5% [95% CI, 0.0%–5.2%]) vs 14 patients (11.7% [95% CI, 5.9%–17.4%], respectively, P = .006). | The temporary postoperative hypocalcaemia rate was 9.1% (11 of 121 patients) in the NIRAF group and 21.7% (26 of 120 patients) in the control group. Between-group difference, 12.6% (95% CI, 5.0%–20.1%); P = .007). Multivariate analyses found that use of NIRAF reduced the risk of hypocalcaemia with an odds ratio of 0.35 (95% CI, 0.15–0.83; P = .02). | None | None                                                         | NA | NA                                                                                                                                                                                                                                                                                                                                                                                                                                                                                                                                                                                                           | Bennilouf F, Godrie-Petit G, Graa R, Gallot JC, Tarrin N, Pannema G, et al. JAMA Surg 2020 Feb 1;155(2):106-112 |
| 52 | Yavuz     | Turkey      | Arch Endocrinol Metab | 2020 | Prospective   | Total thyroidectomy                                               | 43 (129 glands)              | ICG              | 2.5 mg in 3 mL             | IV                         | After thyroidectomy                                            | SPY Elite                               | NA                     | Assess perfusion of parathyroid glands                                                                                                  | 100%                                                                                                                                                                                                                                                                                                                           | Imaging supported decisions of autotransplantation of glands                                                                                                                                                                             | NA                                                                                                                                                                                                                                                                                                                                                             | None | NA                                                           | NA | Yavuz E, Birtek A, Karagalli O, Erten C, Arici S, Yigitba H, et al. Arch Endocrinol Metab 2020 Nov;64(4):477-485                                                                                                                                                                                                                                                                                                                                                                                                                                                                                             |                                                                                                                 |
| 53 | Kim       | US          | J Surg Oncol          | 2020 | Retrospective | Total thyroidectomy                                               | 100 (+200 control)           | Autofluorescence | Not applicable (intrinsic) | Not applicable (intrinsic) | Before dissection                                              | Floobeam (Fhoiptics)                    | NA                     | Assess whether imaging the glands prevents postoperative hypocalcaemia                                                                  | 36.9% (104 of 282 glands in the imaged cases were visualized by autofluorescence before the surgeon made a visual inspection and identified the other glands)                                                                                                                                                                  | Rates of accidental resection were 6% in cases and 14% in controls                                                                                                                                                                       | Rates of transient and permanent hypocalcaemia did not differ between cases and controls                                                                                                                                                                                                                                                                       | None | NA                                                           | NA | Kim YS, Erten O, Kalkanmangli H, Aydin H, Duncanson M, Barber E. J Surg Oncol 2020 Oct;122(5):973-979                                                                                                                                                                                                                                                                                                                                                                                                                                                                                                        |                                                                                                                 |

NA, Not available or not assessed
